# Supplementary material for: Acetaldehyde exchange above a managed temperate mountain grassland
Source: Copernicus journal article supplement (doi:10.5194/acp-14-5369-2014), 2014-06-03
Supplement: Supplementary file 1 [file acp-14-5369-2014-supplement.zip]

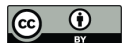

## *Supplement of*

# **Acetaldehyde exchange above a managed temperate mountain grassland**

**L. Hörtnagl et al.**

*Correspondence to:* L. Hörtnagl ([lukas.hoertnagl@usys.ethz.ch](mailto:lukas.hoertnagl@usys.ethz.ch))

- Supplement-Cover-Letter.pdf
- supplementary\_material\_v6\_acetaldehyde.doc
